# Supplementary material for: Unpredictable soil conditions can affect the prevalence of a microbial symbiosis
Source: PeerJ. 2024 May 20;12:e17445. doi: 10.7717/peerj.17445 (PMC11114107; doi:10.7717/peerj.17445)
Supplement: Supplemental Information 3 [file peerj-12-17445-s003.xlsx]

## Sheet: Contents
Page	Description
Fisher's test	Supplemental tables (including p-values) for Fisher tests of Paraburkholderia symbiont coinfections
Total symbiosis	Logistic regression model selection table for having any symbiont
P. agricolaris	Logistic regression model selection table for P. agricolaris prevalence
P. hayleyella	Logistic regression model selection table for P. hayleyella prevalence
P. bonniea	Logistic regression model selection table for P. bonniea prevalence
Amoebophilus	Logistic regression model selection table for Amoebophilus prevalence
Chlamy	Logistic regression model selection table for Chalmydiae prevalence
P. hayleyella & Amoebophilus	Logistic regression model selection table for coinfection prevalence

## Sheet: Fisher's test
Fisher tests
* sampling data from all locations (Haslekorn 2019)													* only those locations that have at least 2/3 burkholderia (coinfections possible)
		Single Infections			Coinfections			Single + Coinfections
Location	Sample Size	BA	BH	BB	BABH	BABB	BHBB	Total BA	Total BH	Total BB			Location	Sample Size	BA	BH	BB	BABH	BABB	BHBB	Total BA	Total BH	Total BB	Total Burk	No Burk	# of tests
Arkansas- Forest City	9	0	3	0	0	0	0	0	3	0			Indiana- Paloka Lake	13	0	4	0	4	0	0	4	12	0	8	5	1
Georgia- Cooper Creek	14	0	0	0	0	0	0	0	0	0			Kentucky- Land Btwn the Lakes	10	2	2	0	4	0	0	6	10	0	8	2	1
Illinois- Effingham	7	2	0	0	0	0	0	2	0	0			Massachusetts- Mt. Greylock	12	4	1	0	0	0	0	4	1	0	5	7	1
Indiana- Bloomington	1	0	1	0	0	0	0	0	1	0			North Carolina- Little Butts Gap	24	1	0	3	0	0	0	1	0	3	4	20	1
Indiana- Bloomington (Lobelia)	17	0	8	0	0	0	0	0	8	0			Tennessee- Indian Gap	10	2	0	1	0	0	0	2	0	1	3	7	1
Indiana- Paloka Lake	13	0	4	0	4	0	0	4	8	0			Texas- Houston Arboretum	59	18	1	0	1	0	0	19	3	0	20	39	1
Kentucky- Land Btwn the Lakes	10	2	2	0	4	0	0	6	6	0			Texas- Linden	7	1	1	0	0	0	0	1	1	0	2	5	1
Massachusetts- Mt. Greylock	12	4	1	0	0	0	0	4	1	0			Virginia- MLBS.b	193	46	23	7	2	0	1	48	29	8	79	114	3
Massachusetts-Boston	9	0	0	0	0	0	0	0	0	0			Virginia- MLBS.a - Bald Knob	226	3	0	4	0	0	0	3	0	4	7	219	1
Michigan	2	1	0	0	0	0	0	1	0	0			TOTAL	554	77	32	15	11	0	1	88	56	16	136	418
Missouri- St. Louis	14	0	0	0	0	0	0	0	0	0
North Carolina- Linville Falls	24	10	0	0	0	0	0	10	0	0
North Carolina- Little Butts Gap	24	1	0	3	0	0	0	1	0	3
Tennessee- Indian Gap	10	2	0	1	0	0	0	2	0	1
Tennessee- Rhodo Thicket	7	3	0	0	0	0	0	3	0	0
Tennessee- Road	13	0	0	0	0	0	0	0	0	0
Tennessee- Sugarlands	6	0	0	2	0	0	0	0	0	2
Texas- Armand Bayou	7	0	0	0	0	0	0	0	0	0
Texas- Carthage	12	0	0	0	0	0	0	0	0	0
Texas- Houston Arboretum	59	18	2	0	1	0	0	19	3	0
Texas- Linden	7	1	1	0	0	0	0	1	1	0
Texas- Webster	4	0	0	0	0	0	0	0	0	0
Virginia- MLBS.b	193	46	23	7	2	0	1	48	26	8
Virginia- MLBS.a - Bald Knob	226	3	0	4	0	0	0	3	0	4
TOTAL	700	93	45	17	11	0	1	104	57	18
*p-values for each comparison, not corrected for multiple comparisons						*p-values for each comparison, corrected for multiple comparisons
Location	BAxBH	BAxBB	BHxBB			Location	BAxBH	BAxBB	BHxBB
Indiana- Paloka Lake	0.104895					Indiana- Paloka Lake	0.314685
Kentucky- Land Btwn the Lakes	1					Kentucky- Land Btwn the Lakes	1
Massachusetts- Mt. Greylock	1					Massachusetts- Mt. Greylock	1
North Carolina- Little Butts Gap		1				North Carolina- Little Butts Gap		1
Tennessee- Indian Gap		1				Tennessee- Indian Gap		1
Texas- Houston Arboretum	0.544126					Texas- Houston Arboretum	1
Texas- Linden	1					Texas- Linden	1
Virginia- MLBS.b	*0.0454003	0.198448	1			Virginia- MLBS.b	0.272402	0.793791	1
Virginia- MLBS.a - Bald Knob		1				Virginia- MLBS.a - Bald Knob		1
							*corrected for multiple comparisons using benjamin-hochberg correction

## Sheet: Total symbiosis
Model	(Intercept)	C/N	Colwells P	Colwells P (last 5 years)	MAP	MAT	pH	df	logLik	AICc	delta	weight
1	-0.235096	0	0	0	0	0	0	2	-455.259	914.536	0	0.129333
17	-0.124262	0	0	0	0	-0.240399	0	3	-454.806	915.647	1.11139	0.0741948
33	-0.164654	0	0	0	0	0	-0.191976	3	-454.868	915.772	1.23601	0.0697126
21	0.0161029	0	0	-0.311036	0	-0.408783	0	4	-453.883	915.824	1.28836	0.0679115
37	-0.0465341	0	0	-0.308208	0	0	-0.341436	4	-453.951	915.961	1.42543	0.0634131
5	-0.203844	0	0	-0.150626	0	0	0	3	-454.991	916.018	1.48183	0.0616499
9	-0.340375	0	0	0	0.150623	0	0	3	-455.048	916.131	1.59521	0.0582521
2	-0.180883	0.0883821	0	0	0	0	0	3	-455.175	916.386	1.84983	0.0512887
3	-0.227024	0	0.0269845	0	0	0	0	3	-455.25	916.536	1.99979	0.0475838
13	-0.377847	0	0	-0.272311	0.288487	0	0	4	-454.337	916.732	2.19646	0.0431273
19	-0.092923	0	-0.260241	0	0	-0.477929	0	4	-454.43	916.918	2.38177	0.039311
7	-0.0861039	0	0.26112	-0.341499	0	0	0	4	-454.556	917.17	2.63411	0.0346512
25	-0.226435	0	0	0	0.140719	-0.232293	0	4	-454.621	917.301	2.76534	0.0324505
35	-0.170036	0	-0.186987	0	0	0	-0.329512	4	-454.639	917.336	2.8001	0.0318914
41	-0.244676	0	0	0	0.100054	0	-0.165109	4	-454.782	917.621	3.08546	0.0276508
49	-0.12859	0	0	0	0	-0.169244	-0.0774167	4	-454.782	917.622	3.0867	0.0276338
18	-0.104744	0.0409854	0	0	0	-0.228366	0	4	-454.789	917.637	3.10098	0.0274371
34	-0.154957	0.0206247	0	0	0	0	-0.184188	4	-454.864	917.787	3.25139	0.0254494
6	-0.137465	0.104298	0	-0.160826	0	0	0	4	-454.87	917.798	3.26205	0.0253141
10	-0.297261	0.0515076	0	0	0.134088	0	0	4	-455.022	918.102	3.56619	0.021743
11	-0.356225	0	-0.0266946	0	0.161937	0	0	4	-455.041	918.139	3.60362	0.0213399
4	-0.18118	0.0918558	-0.00816458	0	0	0	0	4	-455.175	918.408	3.87184	0.0186615

## Sheet: P. agricolaris
Model	(Intercept)	C/N	Colwells P	Colwells P (last 5 years)	MAP	MAT	pH	df	logLik	AICc	delta	weight
1	-2.53198	0	0	0	0	0	0	2	-246.702	497.422	0	0.144376
17	-2.41597	0	0	0	0	-0.372529	0	3	-246.256	498.547	1.12442	0.0822871
33	-2.46965	0	0	0	0	0	-0.308789	3	-246.276	498.587	1.16478	0.0806432
2	-2.36994	0.270586	0	0	0	0	0	3	-246.348	498.732	1.30951	0.0750134
3	-2.48267	0	0.190843	0	0	0	0	3	-246.51	499.054	1.63185	0.0638475
5	-2.54759	0	0	0.0800081	0	0	0	3	-246.668	499.372	1.9495	0.0544711
9	-2.48153	0	0	0	-0.0821273	0	0	3	-246.679	499.393	1.97066	0.053898
18	-2.30974	0.214164	0	0	0	-0.305448	0	4	-246.058	500.175	2.75236	0.036461
34	-2.36892	0.194343	0	0	0	0	-0.237022	4	-246.123	500.304	2.88151	0.0341808
41	-2.32437	0	0	0	-0.216764	0	-0.36819	4	-246.14	500.339	2.9169	0.0335814
49	-2.42949	0	0	0	0	-0.226128	-0.156729	4	-246.216	500.489	3.06714	0.0311512
25	-2.34653	0	0	0	-0.108458	-0.381565	0	4	-246.218	500.493	3.07099	0.0310913
21	-2.38621	0	0	-0.0777281	0	-0.42006	0	4	-246.233	500.523	3.10102	0.0306279
19	-2.41154	0	-0.0940262	0	0	-0.466854	0	4	-246.239	500.536	3.11348	0.0304377
10	-2.23795	0.310639	0	0	-0.173663	0	0	4	-246.248	500.554	3.13127	0.0301682
37	-2.44557	0	0	-0.0800554	0	0	-0.351428	4	-246.252	500.561	3.139	0.0300518
35	-2.47262	0	-0.0286543	0	0	0	-0.331322	4	-246.274	500.606	3.18411	0.0293816
4	-2.368	0.22867	0.109968	0	0	0	0	4	-246.292	500.641	3.21919	0.0288707
6	-2.38596	0.267706	0	0.0675571	0	0	0	4	-246.323	500.705	3.28284	0.0279664
11	-2.34394	0	0.252825	0	-0.199126	0	0	4	-246.393	500.845	3.42256	0.0260794
7	-2.44202	0	0.267078	-0.107509	0	0	0	4	-246.478	501.015	3.59294	0.0239496
13	-2.45281	0	0	0.152946	-0.178252	0	0	4	-246.588	501.234	3.81207	0.0214642

## Sheet: P. hayleyella
Model	(Intercept)	C/N	Colwells P	Colwells P (last 5 years)	MAP	MAT	pH	df	logLik	AICc	delta	weight
3	-4.7114	0	-1.04663	0	0	0	0	3	-145.437	296.91	0	0.134881
5	-4.33976	0	0	-1.23269	0	0	0	3	-145.503	297.04	0.130211	0.126379
7	-4.60146	0	-0.691705	-0.793784	0	0	0	4	-144.9	297.859	0.948795	0.083931
19	-4.49075	0	-1.48074	0	0	-0.743631	0	4	-145.082	298.223	1.31321	0.0699504
6	-4.54285	-0.505958	0	-1.20535	0	0	0	4	-145.105	298.269	1.35938	0.0683542
37	-4.42948	0	0	-1.09642	0	0	0.343782	4	-145.364	298.787	1.877	0.0527675
11	-4.67542	0	-1.03468	0	-0.0521238	0	0	4	-145.434	298.927	2.01666	0.0492082
35	-4.71082	0	-1.05659	0	0	0	-0.016543	4	-145.437	298.933	2.02331	0.0490449
4	-4.71067	0.00380101	-1.04867	0	0	0	0	4	-145.438	298.933	2.02342	0.0490421
13	-4.3709	0	0	-1.25049	0.0547801	0	0	4	-145.5	299.058	2.14767	0.0460883
21	-4.36464	0	0	-1.21524	0	0.04916	0	4	-145.5	299.059	2.14896	0.0460586
1	-4.61428	0	0	0	0	0	0	2	-147.537	299.091	2.18137	0.0453182
33	-4.5775	0	0	0	0	0	0.733739	3	-146.794	299.622	2.71219	0.0347541
17	-4.86491	0	0	0	0	0.604053	0	3	-147.151	300.337	3.42708	0.0243092
2	-4.70982	-0.510454	0	0	0	0	0	3	-147.166	300.367	3.4575	0.0239422
9	-4.25111	0	0	0	-0.528015	0	0	3	-147.247	300.53	3.61998	0.0220741
41	-4.39942	0	0	0	-0.311895	0	0.668604	4	-146.672	301.403	4.49315	0.0142651
34	-4.64547	-0.267079	0	0	0	0	0.608557	4	-146.695	301.448	4.53768	0.013951
49	-4.53194	0	0	0	0	-0.122779	0.817482	4	-146.786	301.63	4.7203	0.0127335
25	-4.47805	0	0	0	-0.520713	0.608186	0	4	-146.852	301.761	4.8516	0.0119244
18	-4.89262	-0.397382	0	0	0	0.46091	0	4	-146.938	301.935	5.02504	0.010934
10	-4.43236	-0.420882	0	0	-0.373101	0	0	4	-147.019	302.096	5.18591	0.0100889

## Sheet: P. bonniea
Model	(Intercept)	C/N	Colwells P	Colwells P (last 5 years)	MAP	MAT	pH	df	logLik	AICc	delta	weight
3	-4.21198	0	1.18143	0	0	0	0	3	-77.5799	161.195	0	0.157046
35	-4.08326	0	1.40196	0	0	0	0.456326	4	-76.6564	161.371	0.176303	0.143794
13	-4.092	0	0	1.19028	-0.740976	0	0	4	-76.7259	161.51	0.315284	0.134141
4	-4.01633	-0.293069	1.02438	0	0	0	0	4	-76.9168	161.892	0.697051	0.110831
7	-4.02571	0	0.715877	0.289614	0	0	0	4	-77.2379	162.534	1.33933	0.0803885
21	-3.96864	0	0	0.544307	0	-0.565212	0	4	-77.2696	162.597	1.40278	0.0778781
5	-3.96272	0	0	0.659213	0	0	0	3	-78.3885	162.812	1.61727	0.0699583
11	-4.25286	0	1.37378	0	-0.19429	0	0	4	-77.4205	162.899	1.7045	0.0669728
19	-4.22022	0	1.15521	0	0	-0.0692373	0	4	-77.5714	163.201	2.00639	0.0575896
6	-3.90858	-0.106665	0	0.638081	0	0	0	4	-78.2669	164.592	3.39743	0.0287265
37	-3.96859	0	0	0.649426	0	0	-0.0413985	4	-78.3791	164.817	3.62182	0.0256778
17	-4.0792	0	0	0	0	-0.946661	0	3	-80.2001	166.435	5.24045	0.0114308
49	-4.13034	0	0	0	0	-2.03728	0.797113	4	-79.5835	167.225	6.03052	0.00770043
18	-3.9149	-0.302299	0	0	0	-0.90705	0	4	-79.7566	167.571	6.37667	0.00647664
25	-4.04924	0	0	0	0.257829	-0.898134	0	4	-79.8225	167.703	6.5086	0.00606318
1	-4.435	0	0	0	0	0	0	2	-82.1464	168.31	7.11547	0.00447632
33	-4.36217	0	0	0	0	0	-0.521998	3	-81.37	168.775	7.58022	0.00354815
9	-4.48199	0	0	0	0.253648	0	0	3	-81.9407	169.916	8.72162	0.00200517
2	-4.44758	-0.0874625	0	0	0	0	0	3	-82.1236	170.282	9.08742	0.00167
34	-4.35856	-0.191227	0	0	0	0	-0.525826	4	-81.2583	170.575	9.38015	0.00144262
41	-4.40409	0	0	0	0.180375	0	-0.476026	4	-81.2778	170.614	9.41907	0.00141482
10	-4.49999	-0.123371	0	0	0.265278	0	0	4	-81.8894	171.837	10.6423	0.000767514

## Sheet: Amoebophilus
Model	(Intercept)	C/N	Colwells P	Colwells P (last 5 years)	MAP	MAT	pH	df	logLik	AICc	delta	weight
9	-2.86861	0	0	0	-0.537662	0	0	3	-270.922	547.878	0	0.140714
1	-3.30345	0	0	0	0	0	0	2	-271.985	547.988	0.109702	0.133203
13	-2.80323	0	0	0.301952	-0.764202	0	0	4	-270.586	549.23	1.35112	0.0716052
25	-2.92067	0	0	0	-0.539999	0.161036	0	4	-270.801	549.659	1.78096	0.0577572
11	-2.80668	0	0.101583	0	-0.587143	0	0	4	-270.867	549.792	1.91336	0.0540575
17	-3.36092	0	0	0	0	0.155831	0	3	-271.892	549.819	1.94041	0.0533311
10	-2.79799	0.0834937	0	0	-0.55885	0	0	4	-270.888	549.835	1.9561	0.0529146
41	-2.8369	0	0	0	-0.560229	0	-0.0599853	4	-270.904	549.867	1.98812	0.0520741
3	-3.32226	0	-0.0705	0	0	0	0	3	-271.959	549.952	2.07364	0.0498943
33	-3.32298	0	0	0	0	0	0.0734638	3	-271.962	549.96	2.08113	0.0497078
2	-3.33441	-0.0468801	0	0	0	0	0	3	-271.976	549.988	2.10917	0.0490158
5	-3.29389	0	0	-0.0277305	0	0	0	3	-271.982	549.998	2.1197	0.0487584
49	-3.36542	0	0	0	0	0.241859	-0.104989	4	-271.873	551.805	3.92677	0.0197537
21	-3.39016	0	0	0.0519913	0	0.185169	0	4	-271.882	551.822	3.94378	0.0195864
19	-3.3642	0	0.0601877	0	0	0.208895	0	4	-271.883	551.824	3.9459	0.0195657
18	-3.36424	-0.00597628	0	0	0	0.154179	0	4	-271.892	551.842	3.96348	0.0193945
7	-3.35292	0	-0.110305	0.0572374	0	0	0	4	-271.951	551.961	4.08244	0.0182745
35	-3.32581	0	-0.0483575	0	0	0	0.0356419	4	-271.956	551.97	4.09146	0.0181923
4	-3.32979	-0.0134791	-0.0652676	0	0	0	0	4	-271.958	551.974	4.09579	0.018153
34	-3.33439	-0.0204292	0	0	0	0	0.065546	4	-271.961	551.98	4.10155	0.0181007
37	-3.32717	0	0	0.00854532	0	0	0.0780579	4	-271.962	551.982	4.10395	0.018079
6	-3.32442	-0.043766	0	-0.0229659	0	0	0	4	-271.974	552.006	4.12749	0.0178675

## Sheet: Chlamy
Model	(Intercept)	C/N	Colwells P	Colwells P (last 5 years)	MAP	MAT	pH	df	logLik	AICc	delta	weight
37	-1.52892	0	0	-0.53864	0	0	-0.529972	4	-372.119	752.297	0	0.172138
1	-1.84037	0	0	0	0	0	0	2	-374.74	753.498	1.20092	0.0944279
13	-1.96928	0	0	-0.443738	0.402591	0	0	4	-372.879	753.817	1.52019	0.0804957
5	-1.76673	0	0	-0.285667	0	0	0	3	-374.07	754.175	1.87879	0.0672829
21	-1.55354	0	0	-0.468943	0	-0.460669	0	4	-373.063	754.184	1.88788	0.0669777
33	-1.72961	0	0	0	0	0	-0.277244	3	-374.153	754.34	2.04357	0.0619615
9	-1.95133	0	0	0	0.215278	0	0	3	-374.398	754.83	2.53382	0.0484915
7	-1.60556	0	0.339615	-0.523592	0	0	0	4	-373.471	755.001	2.70448	0.0445254
17	-1.74252	0	0	0	0	-0.214184	0	3	-374.491	755.017	2.7199	0.0441834
35	-1.75085	0	-0.369863	0	0	0	-0.556423	4	-373.527	755.112	2.81514	0.0421288
2	-1.82655	0.0215312	0	0	0	0	0	3	-374.737	755.509	3.21217	0.0345433
3	-1.84191	0	-0.00540222	0	0	0	0	3	-374.74	755.514	3.21761	0.0344494
41	-1.8421	0	0	0	0.155801	0	-0.236142	4	-373.986	756.029	3.73281	0.0266261
6	-1.74467	0.0357413	0	-0.28723	0	0	0	4	-374.06	756.178	3.88135	0.0247203
34	-1.77322	-0.0820985	0	0	0	0	-0.304133	4	-374.109	756.277	3.97989	0.0235318
49	-1.748	0	0	0	0	0.121923	-0.358388	4	-374.121	756.3	4.00315	0.0232597
19	-1.72822	0	-0.315164	0	0	-0.513908	0	4	-374.137	756.332	4.03524	0.0228895
25	-1.88223	0	0	0	0.210398	-0.197089	0	4	-374.174	756.407	4.1099	0.0220508
11	-2.02505	0	-0.0869638	0	0.249512	0	0	4	-374.336	756.73	4.43388	0.0187531
10	-2.01236	-0.0388395	0	0	0.231011	0	0	4	-374.385	756.829	4.53259	0.01785
18	-1.75566	-0.0241661	0	0	0	-0.220957	0	4	-374.487	757.032	4.73556	0.0161274
4	-1.82657	0.0283753	-0.0150895	0	0	0	0	4	-374.735	757.528	5.23149	0.0125856

## Sheet: P. hayleyella & Amoebophilus
Model	(Intercept)	C/N	Colwells P	Colwells P (last 5 years)	MAP	MAT	pH	df	logLik	AICc	delta	weight
1	-6.86251	0	0	0	0	0	0	2	-73.1965	150.41	0	0.129879
9	-5.77522	0	0	0	-1.05897	0	0	3	-72.5295	151.094	0.683557	0.0922797
19	-6.61593	0	-1.7336	0	0	-2.13811	0	4	-71.7963	151.651	1.2404	0.0698536
3	-7.0533	0	-0.607126	0	0	0	0	3	-72.8232	151.681	1.27102	0.0687922
2	-7.11495	-0.550901	0	0	0	0	0	3	-72.9263	151.887	1.47705	0.0620584
33	-6.80514	0	0	0	0	0	0.477798	3	-73.0225	152.08	1.66963	0.0563615
17	-6.63347	0	0	0	0	-0.241805	0	3	-73.162	152.359	1.94855	0.0490249
5	-6.84255	0	0	-0.173403	0	0	0	3	-73.1708	152.376	1.96614	0.0485956
49	-5.85276	0	0	0	0	-1.65009	1.36381	4	-72.2691	152.597	2.18617	0.0435329
13	-5.49038	0	0	0.608459	-1.44772	0	0	4	-72.3361	152.73	2.32014	0.0407124
11	-6.23956	0	-0.451045	0	-0.996791	0	0	4	-72.3446	152.747	2.33708	0.040369
10	-6.0146	-0.322774	0	0	-0.953978	0	0	4	-72.4229	152.904	2.49375	0.0373273
25	-5.68939	0	0	0	-1.0294	-0.252344	0	4	-72.488	153.034	2.62396	0.0349747
41	-5.88286	0	0	0	-0.963391	0	0.186579	4	-72.4989	153.056	2.64566	0.0345973
7	-7.21737	0	-0.95246	0.621503	0	0	0	4	-72.6895	153.437	3.02682	0.0285939
4	-7.20227	-0.32957	-0.451238	0	0	0	0	4	-72.7583	153.575	3.1645	0.0266917
35	-7.0492	0	-0.575456	0	0	0	0.057983	4	-72.8219	153.702	3.29166	0.0250474
18	-6.76134	-0.597058	0	0	0	-0.410276	0	4	-72.8236	153.705	3.29513	0.025004
34	-7.0485	-0.444198	0	0	0	0	0.257975	4	-72.8759	153.81	3.39975	0.0237297
6	-7.11439	-0.542072	0	-0.0995557	0	0	0	4	-72.9181	153.894	3.48406	0.0227502
37	-6.80558	0	0	0.106813	0	0	0.541745	4	-73.0159	154.09	3.67968	0.0206304
21	-6.48051	0	0	-0.308758	0	-0.40716	0	4	-73.088	154.234	3.82395	0.0191946
